# Supplementary material for: Pangenome Evolution in the Marine Bacterium Alteromonas
Source: PubMed Central journal article supplement — Genome Biol Evol. 2016 Apr 29;8(5):1556–70. doi: 10.1093/gbe/evw098 (PMC4898812; doi:10.1093/gbe/evw098), 2016-04-29
Supplement: supp_evw098_Supplementary_Material_Lopez-Perez.pdf [file supp_evw098_Supplementary_Material_Lopez-Perez.pdf]

## **Pangenome evolution in the marine bacterium *Alteromonas***

Mario López-Pérez<sup>1</sup> and Francisco Rodríguez-Valera<sup>1\*</sup>

<sup>1</sup>Evolutionary Genomics Group, Departamento de Producción Vegetal y Microbiología, Universidad Miguel Hernández, San Juan de Alicante, 03550, Alicante, Spain

\*Corresponding author: [frvalera@umh.es](mailto:frvalera@umh.es)

Evolutionary Genomics Group, División de Microbiología, Universidad Miguel Hernández, Apartado 18, San Juan 03550, Alicante, Spain

Phone +34-965919313, Fax +34-965 919457

# Supplementary Figure S1

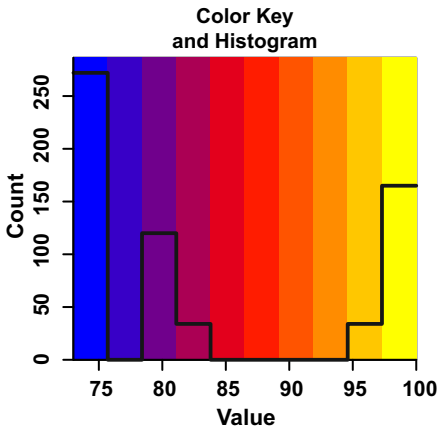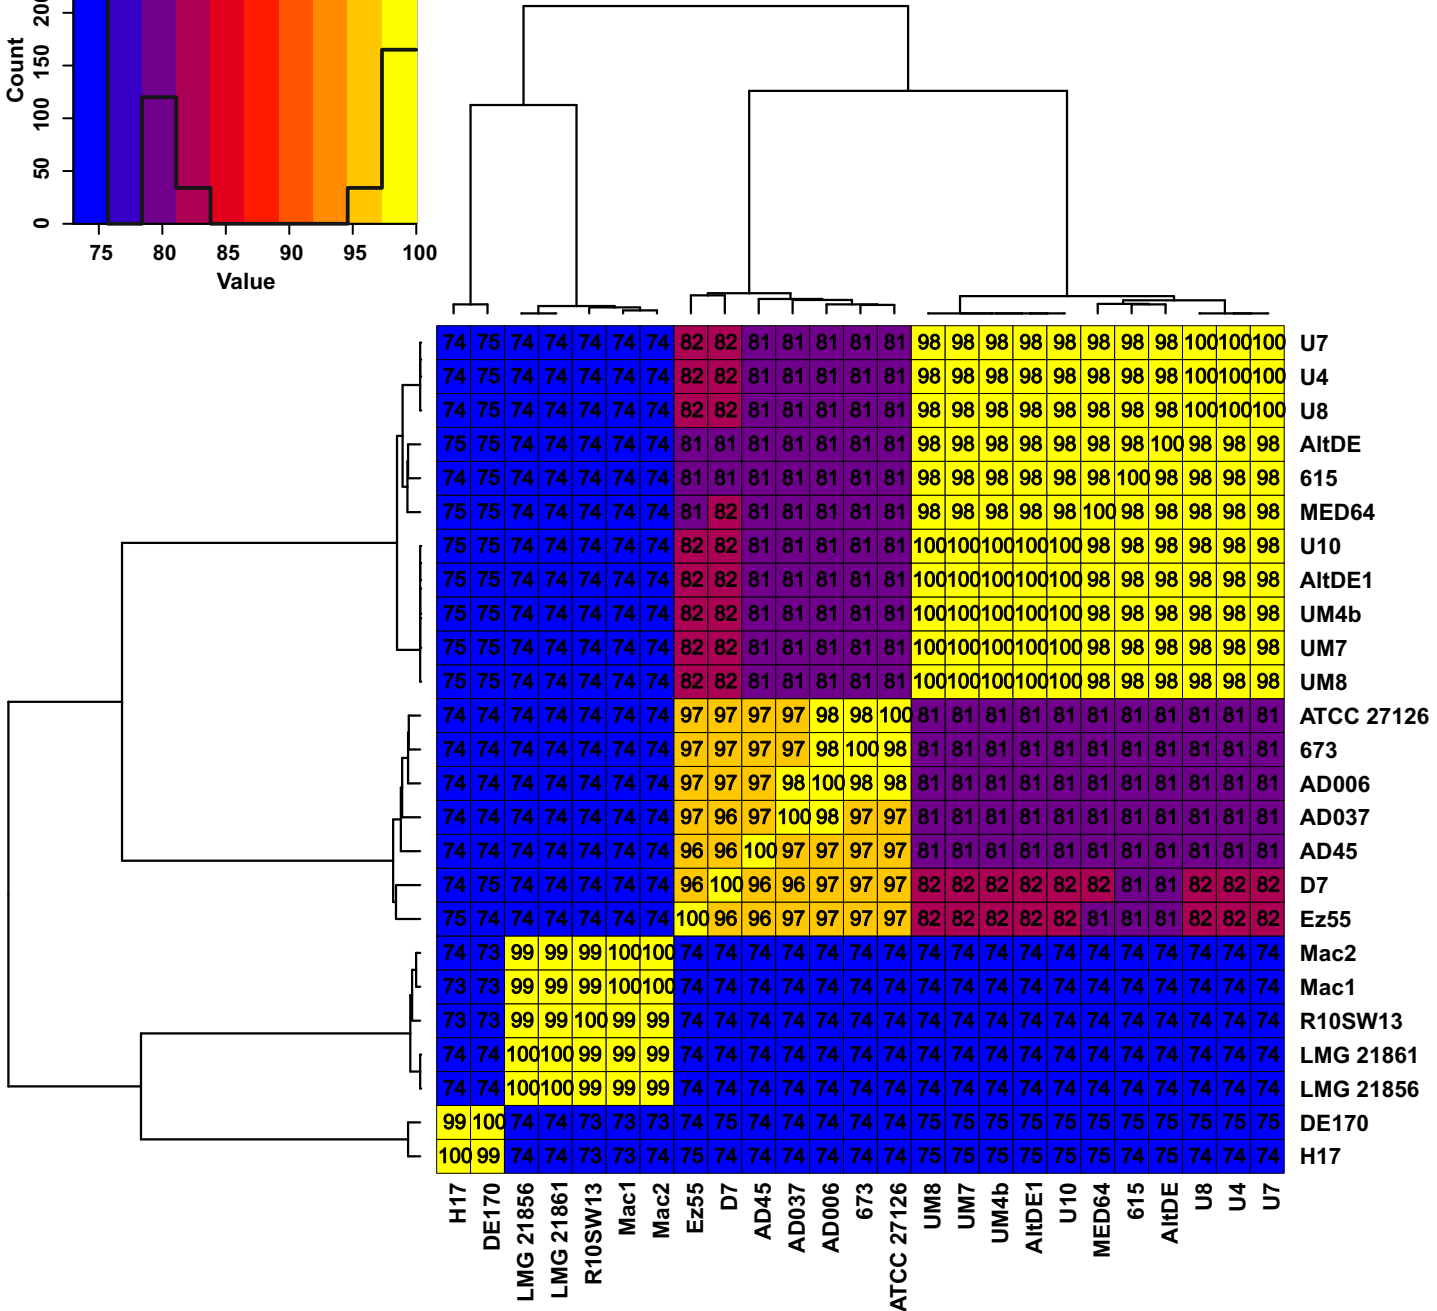

# Supplementary Figure S2

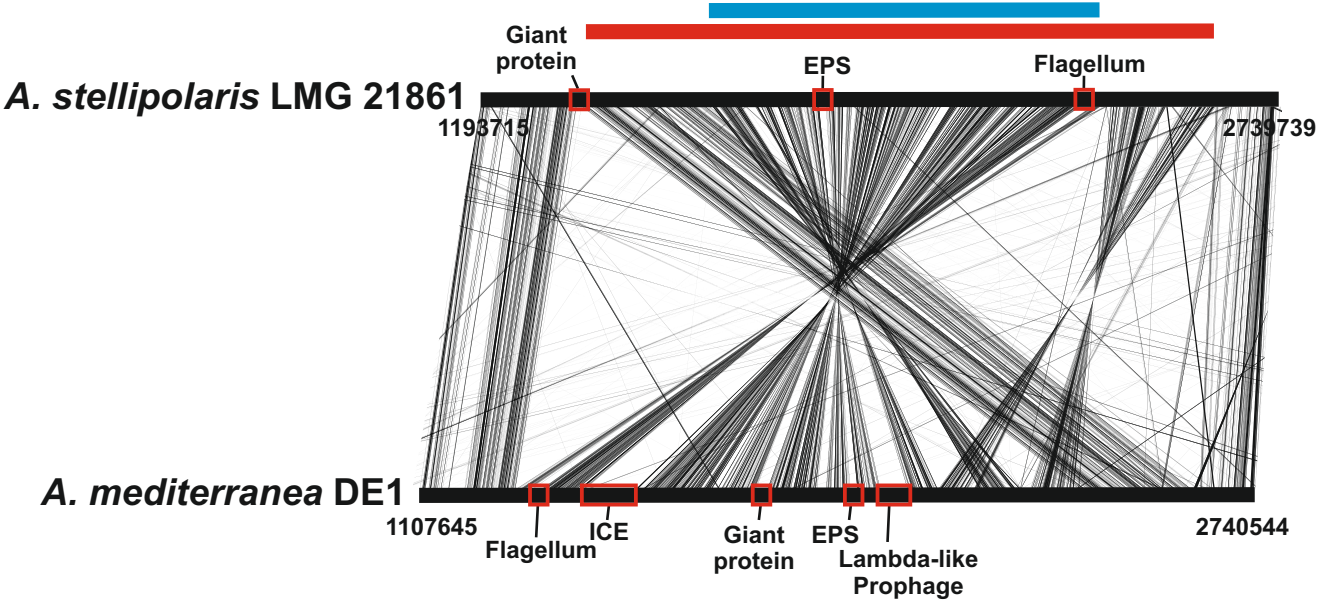

# Supplementary Figure S3

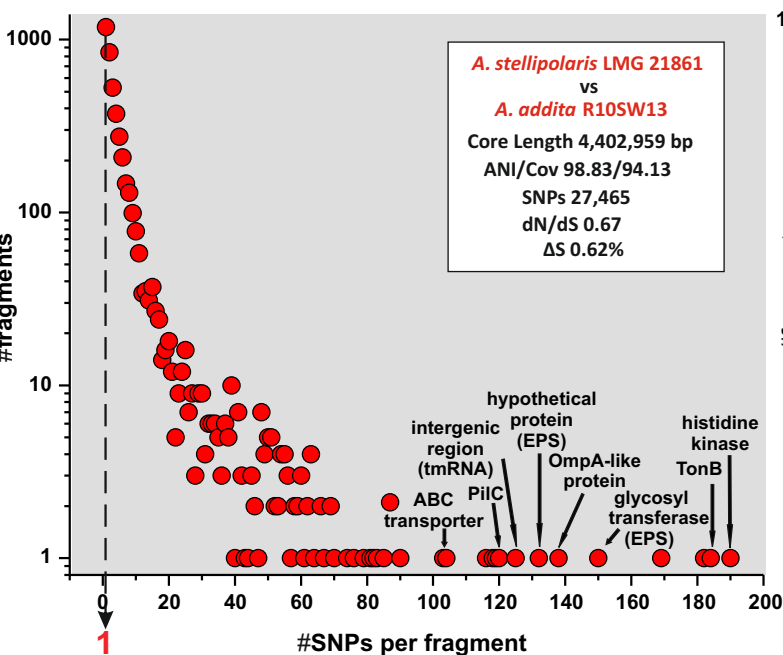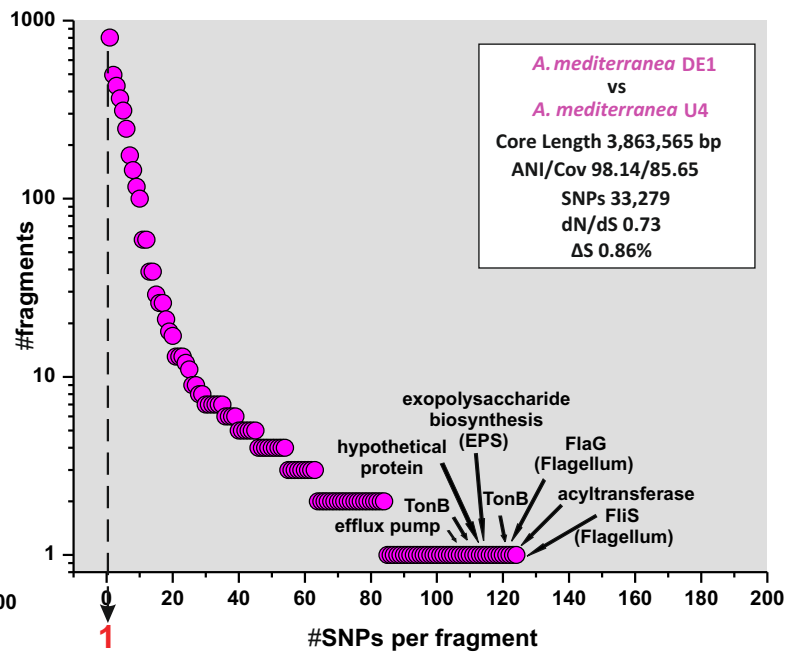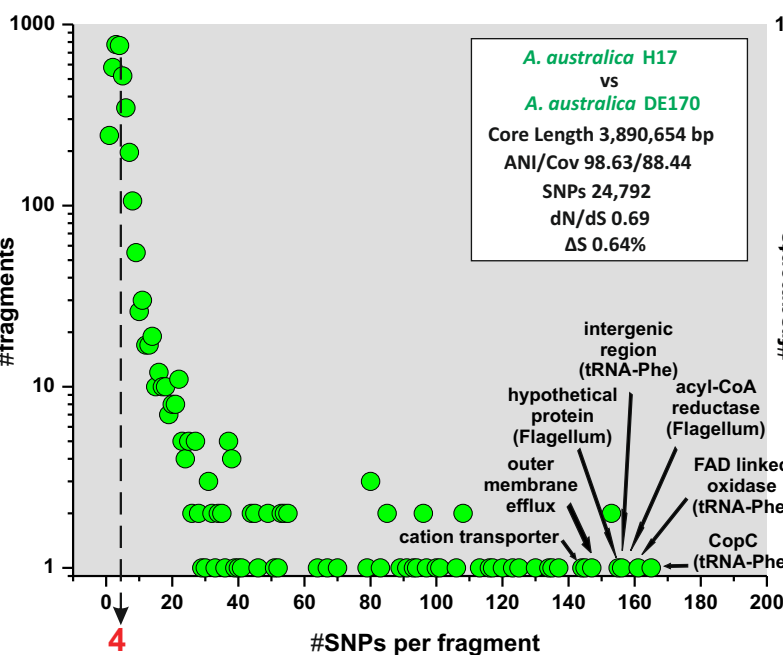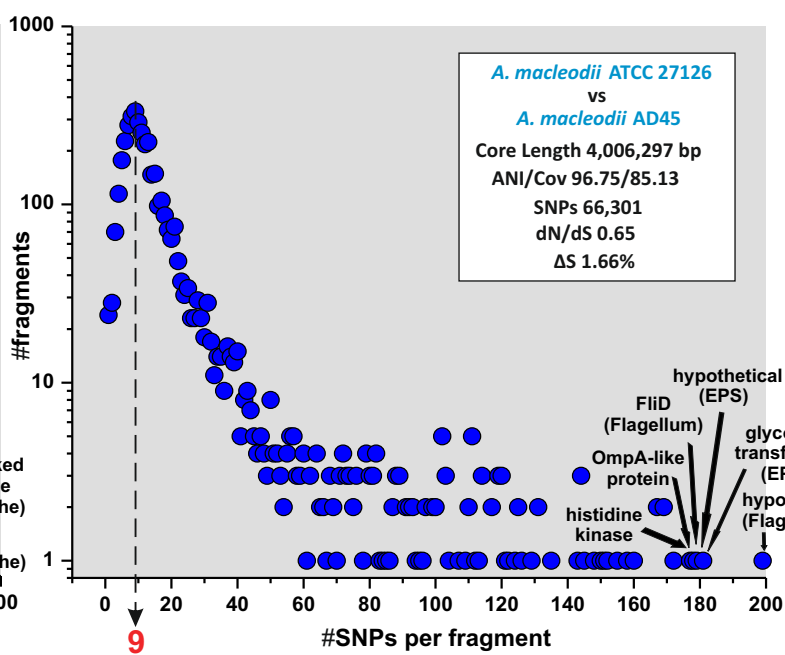

# Supplementary Figure S4

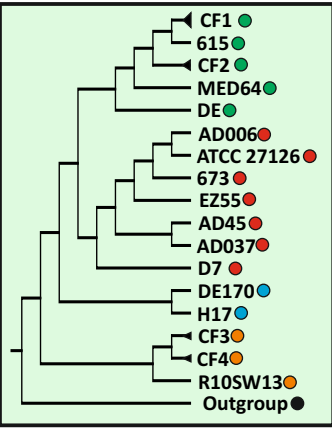

Consensus tree  
(1,378,334 bp)

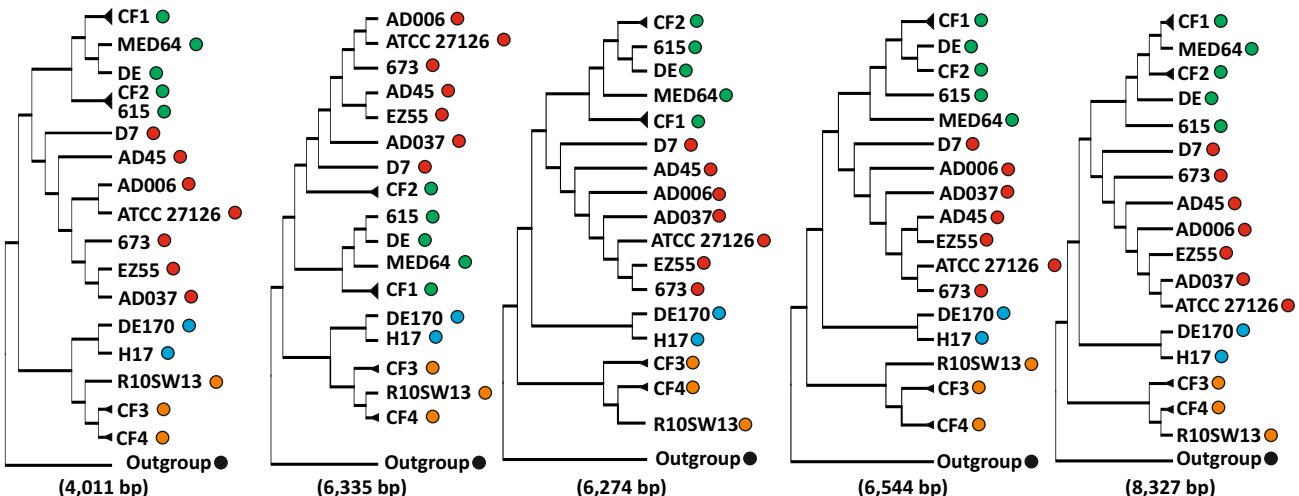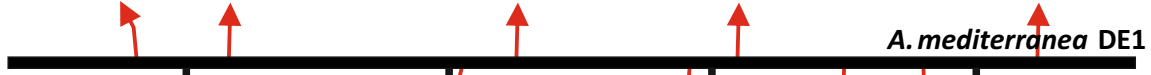

*A. mediterranea* DE1

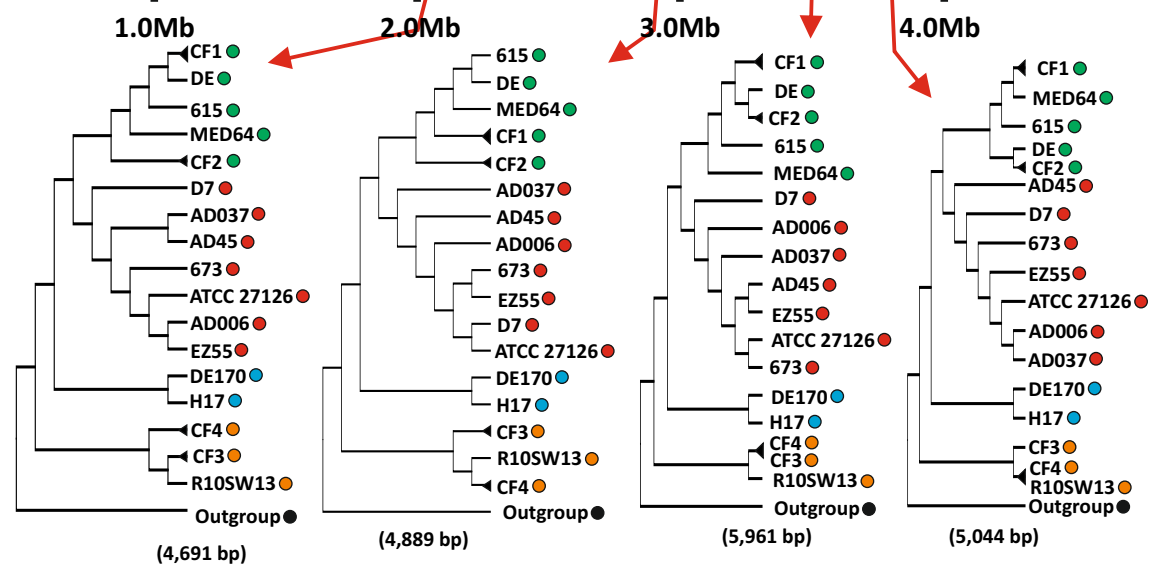

# Supplementary Figure S5

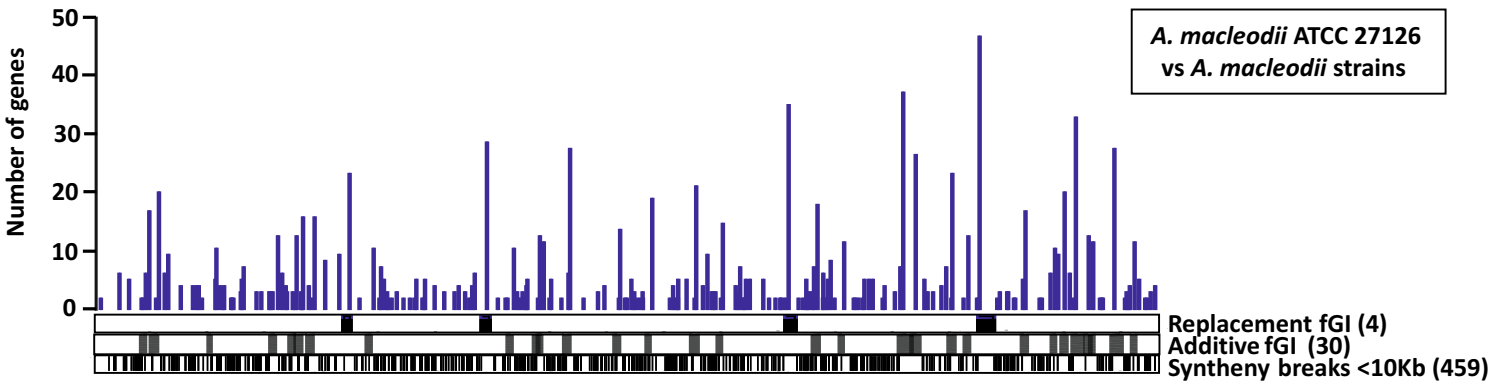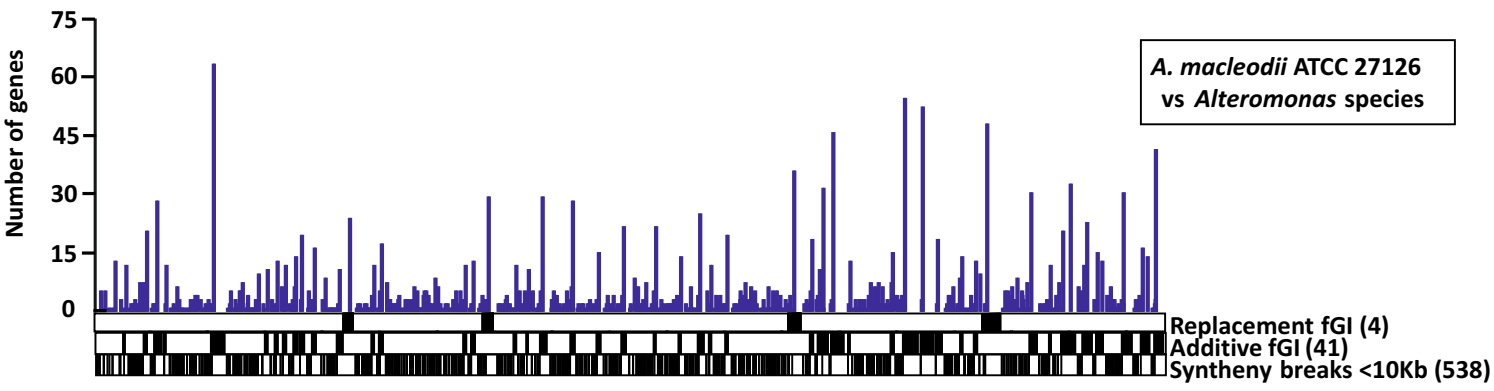

# Supplementary Figure S6

% similarity

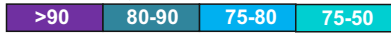

## O-chain of the LPS

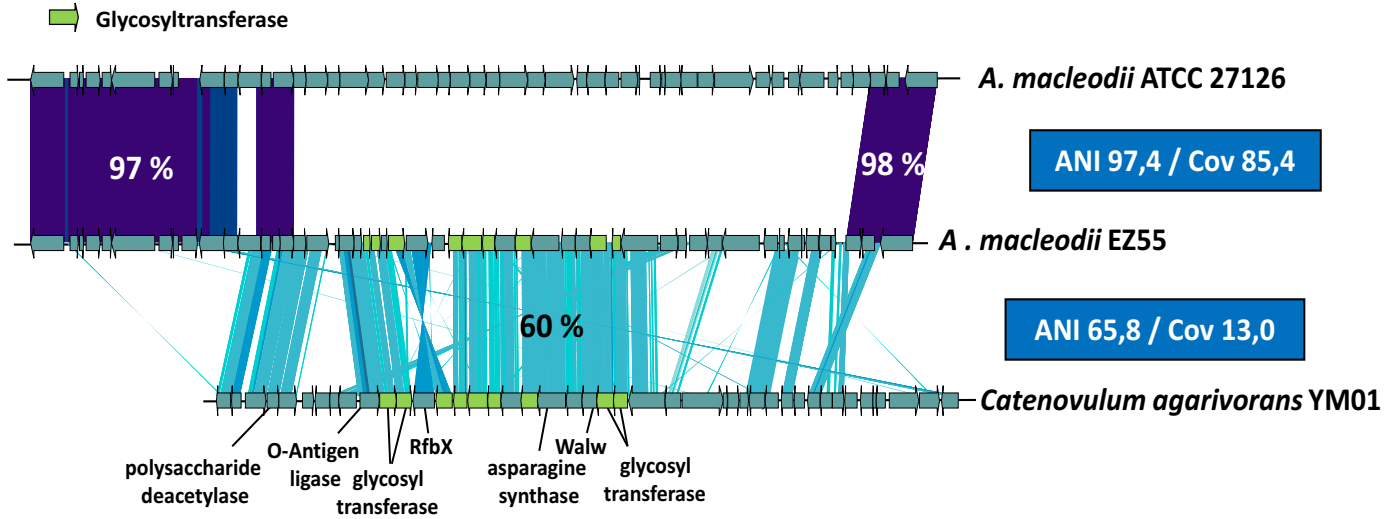

## Flagellum glycosylation island

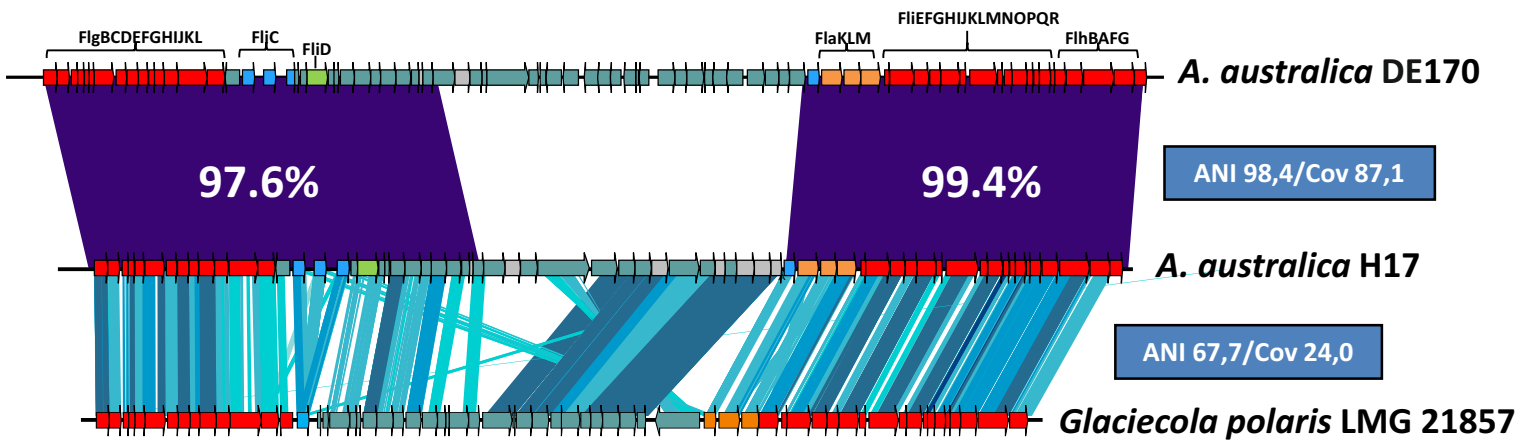

**TABLE S1.** *Alteromonas* isolates used in this study and their origin. Genomes that reported here for the first time are highlighted in red

| <i>Alteromonas</i> strain      | Origin isolated        | Location                 | Date | Depth of Sample (m) |
|--------------------------------|------------------------|--------------------------|------|---------------------|
| <b><i>A. mediterranea</i></b>  |                        |                          |      |                     |
| DE <sup>T</sup>                | Adriatic Sea           | 41°37'N, 17°22'E         | 2003 | 1000                |
| DE1                            | Adriatic Sea           | 41°37'N, 17°22'E         | 2003 | 1000                |
| 615                            | English Channel        | 50°15'N, 4°16'W          | 2005 | Surface             |
| U4                             | Ionian Sea             | 35°13.83'N, 21°28.29'E   | 1998 | 3475                |
| U7                             | Ionian Sea             | 35°13.83'N, 21°28.29'E   | 1998 | 3500                |
| U8                             | Ionian Sea             | 35°13.83'N, 21°28.29'E   | 1998 | 3500                |
| U10                            | Ionian Sea             | 35°13.83'N, 21°28.29'E   | 1998 | 3500                |
| UM7                            | Ionian Sea             | 35°13.83'N, 21°28.29'E   | 1998 | 3475                |
| UM8                            | Ionian Sea             | 35°13.83'N, 21°28.29'E   | 1998 | 3475                |
| UM4b                           | Ionian Sea             | 35°13.83'N, 21°28.29'E   | 1998 | 3455                |
| MED64                          | Aegean Sea             | 32°81'N, 34°69'E         | 2000 | Surface             |
| <b><i>A. macleodii</i></b>     |                        |                          |      |                     |
| ATCC 27126 <sup>T</sup>        | Pacific Ocean          | 21°17'23''N 157°58'34''W | 1972 | Surface             |
| 673                            | English Channel        | 50°15'N, 4°16'W          | 2005 | Surface             |
| AD45                           | Balearic Sea           | --                       | 2003 | Surface             |
| D7                             | Andaman Sea            | 08°00'N, 98°00'E         | 2000 | Surface             |
| EZ55                           | Sargasso Sea           | --                       | 2008 | Surface             |
| AD006                          | Malaysia: Port Dickson | 2°31'21''N 101°48'14''E  | 2014 | Surface             |
| AD037                          | Malaysia: Port Dickson | 2°31'21''N 101°48'14''E  | 2014 | Surface             |
| <b><i>A. australica</i></b>    |                        |                          |      |                     |
| H 17 <sup>T</sup>              | Tasman Sea             | 37°52'10''S 144°58'27''E | 2007 | Surface             |
| DE170                          | Adriatic Sea           | 41°37'N, 17°22'E         | 2003 | 1000                |
| <b><i>A. addita</i></b>        |                        |                          |      |                     |
| R10SW13 <sup>T</sup>           | Sea of Japan           | 42°40'23''N 131°38'42''E | 2000 | Surface             |
| <b><i>A. stellipolaris</i></b> |                        |                          |      |                     |
| LMG 21861 <sup>T</sup>         | Antarctic Sea          | 66° 20.0' S 08° 53.4' E  | 1999 | 25                  |
| LMG 21856                      | Antarctic Sea          | 66° 21.9' S 33° 46.7' E  | 1999 | 25                  |
| <b><i>Alteromonas</i> sp.</b>  |                        |                          |      |                     |
| Mac1                           | Mediterranean Sea      | 38°25'48'' N 0°22'25'' W | 2014 | Surface             |
| Mac2                           | Mediterranean Sea      | 38°25'48'' N 0°22'25'' W | 2014 | Surface             |



**TABLE S2.** The twenty genes with the highest dN /dS values obtained within the *A. mediterranea* strains.

| <i>A. mediterranea</i> DE1 coordinates | dN /dS | Gene product                                                       |
|----------------------------------------|--------|--------------------------------------------------------------------|
| 3,596,902 - 3,598,002                  | 3.97   | permease YjgP/YjgQ CDS                                             |
| 168,106 - 168,915                      | 3.78   | hypothetical protein                                               |
| 2,984,023 - 2,983,268                  | 3.43   | hypothetical protein                                               |
| 1,513,585 - 1,512,839                  | 3.29   | Enoyl-CoA hydratase/isomerase                                      |
| 1,216,789 - 1,219,386                  | 3.16   | alanyl-tRNA synthetase                                             |
| 2,252,675 - 2,254,264                  | 2.97   | hypothetical protein TPR (tetratricopeptide repeat)                |
| 2,403,655 - 2,405,973                  | 2.89   | Predicted exporters of the RND superfamily                         |
| 4,214,839 - 4,212,998                  | 2.55   | amino acid ABC transporter/signal transduction system              |
| 487,898 - 489,037                      | 2.27   | RND family efflux transporter MFP subunit                          |
| 2,291,861 - 2,294,728                  | 2.24   | TonB-dependent receptor                                            |
| 4,295,677 - 4,298,625                  | 2.18   | TonB-dependent receptor                                            |
| 1,508,773 - 1,506,896                  | 2.11   | ABC transporter ATP-binding protein/permease                       |
| 4,256,192 - 4,254,591                  | 2.10   | p-aminobenzoyl-glutamate transport                                 |
| 3,531,718 - 3,529,364                  | 1.98   | Histidine kinase (aerobic respiration control sensor protein ArcB) |
| 2,434,188 - 2,432,557                  | 1.96   | Glutamate synthase                                                 |
| 2,355,773 - 2,354,532                  | 1.95   | Radical SAM                                                        |
| 2,422,725 - 2,421,418                  | 1.92   | deoxyribodipyrimidine photolyase                                   |
| 1,494,510 - 1,494,094                  | 1.88   | hypothetical protein                                               |
| 1,768,924 - 1,767,671                  | 1.76   | proton/glutamate symporter                                         |
| 480,575 - 482,266                      | 1.71   | gamma-glutamyltransferase                                          |
